# Supplementary material for: Local structure and piezoelectric instability in lead-free (1 − x)BaTiO3-xA(Cu1/3Nb2/3)O3(A = Sr, Ca, Ba) solid solutions
Source: Royal Society of Chemistry journal article supplement (doi:10.1039/c3ra44886j), 2013-12-02
Supplement: c3ra44886j.docx [file c3ra44886j.docx]

**Supplemental Material**

**
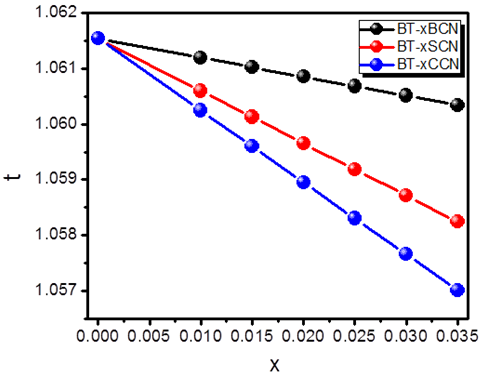
**

**Figure S-1** Tolerance factor (t) as a function of compositions of different series showing a higher rate of decrease for the compounds having an isovalent substitution on A-sites and aliovalent substitution on B-sites.
